# Supplementary material for: Targeted deletion of the RNA-binding protein Caprin1 leads to progressive hearing loss and impairs recovery from noise exposure in mice
Source: PubMed Central journal article supplement (PMC8844073; doi:10.1038/s41598-022-05657-2), 2022-02-14
Supplement: 41598_2022_5657_MOESM2_ESM.pdf [file 41598_2022_5657_MOESM2_ESM.pdf]

**Targeted deletion of the RNA-binding protein *Caprin1* leads to progressive hearing loss and impairs recovery from noise exposure in mice**

Lisa S. Nolan<sup>1,2</sup>, Jing Chen<sup>2</sup>, Ana-Claudia Goncalves<sup>1</sup>, Anwen Bullen<sup>1</sup>, Emily R. Towers<sup>1</sup>, Karen P. Steel<sup>2</sup>, Sally J. Dawson<sup>1\*</sup> and Jonathan E. Gale<sup>1\*</sup>

<sup>1</sup>UCL Ear Institute, 332 Gray's Inn Road, London. WC1X 8EE

<sup>2</sup>Wolfson Centre for Age-Related Diseases, King's College London, Guy's Campus, London. SE1 1UL.

**SUPPLEMENTARY FIGURE 1**

## SUPPLEMENTARY FIGURE 1

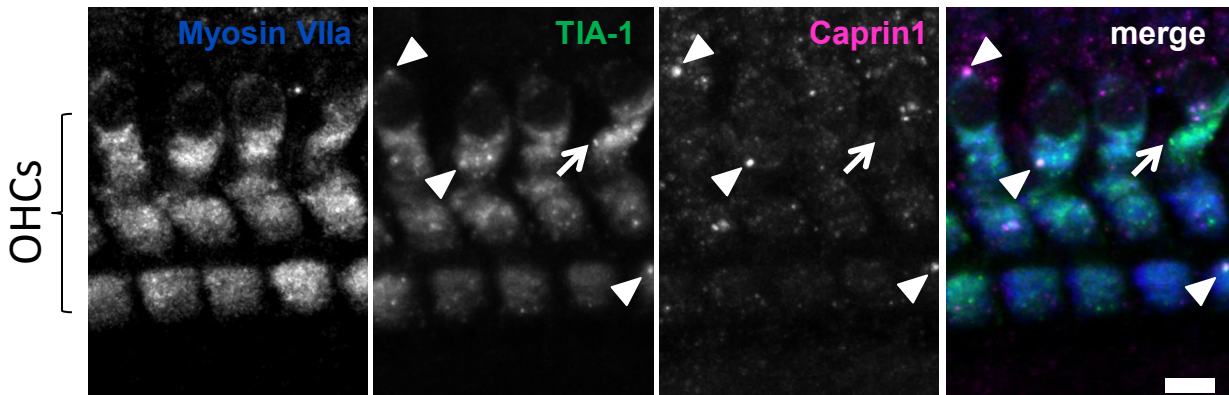

**Supplementary Figure 1. Noise exposure induced stress granule formation in outer hair cells *in vivo*.** P18-20 C57/BL6 mice subjected to noise (100dbSPL, 2 hours). Vibratome cochlear slices (from cochlea fixed at the end of the noise exposure) were immunolabelled with myosinVIIa (blue), TIA-1 (green), Caprin1 (red). Stress granules were identified in the OHC region of the organ of Corti. Arrowheads indicate stress granules positive for both TIA-1, and Caprin1 or in some cases Caprin1-negative stress granules (arrow). Scale bar, 5  $\mu$ m.
